# Supplementary material
Source: PubMed Central journal article supplement (PMC2785689)
Supplement: supp_M109.016311_jbc.M109.016311-1.pdf [file supp_M109.016311_jbc.M109.016311-1.pdf]

## SUPPLEMENTARY DATA

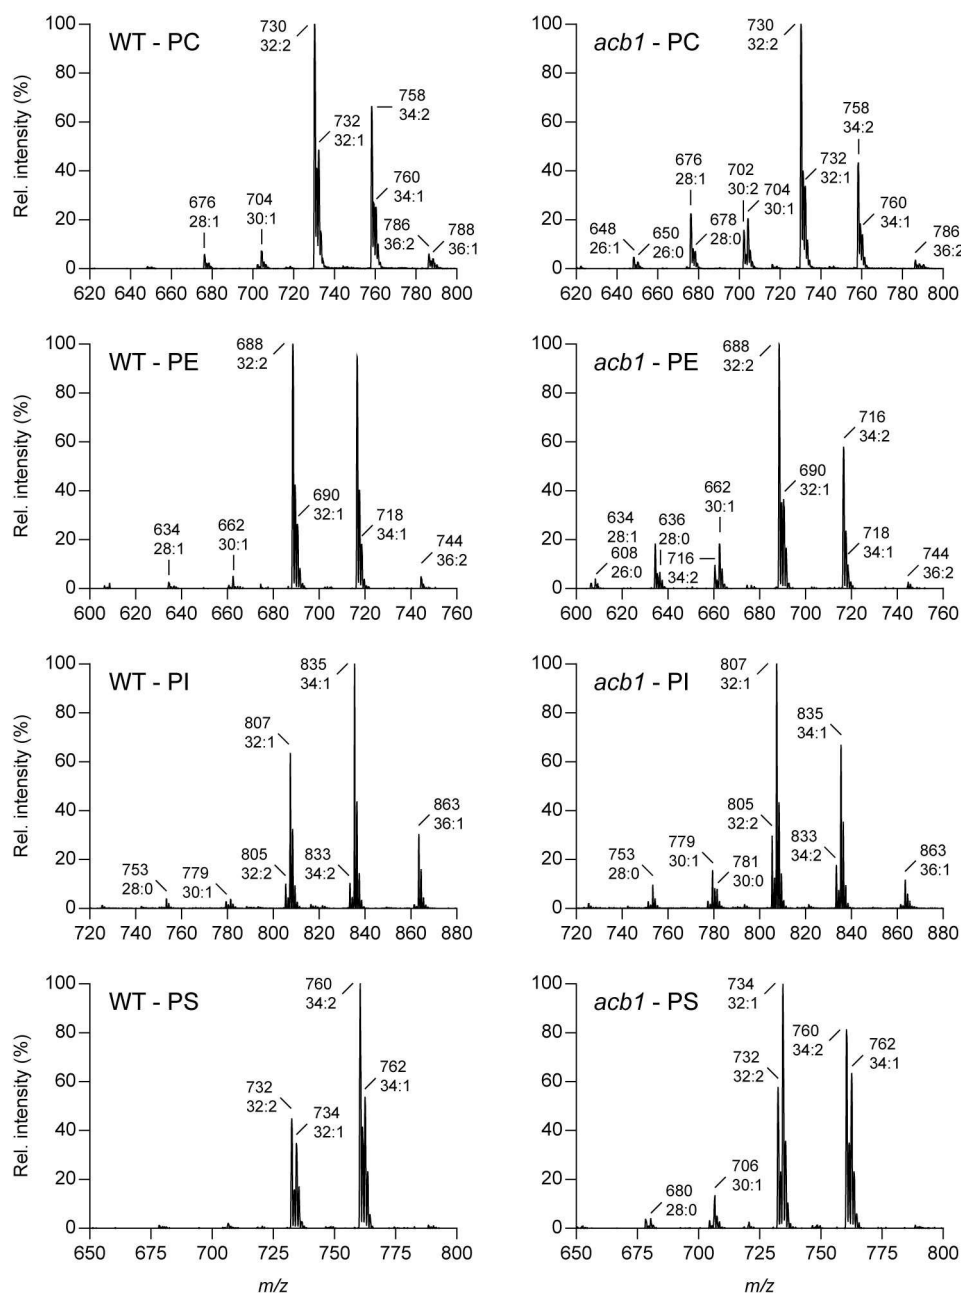

**Figure S1** The effect of deleting the *ACB1* gene on the species profiles of phospholipids in yeast. Wild type (WT) and *acb1* cells were cultured in SL medium, harvested at late log-phase, and total lipid extracts were prepared. Phospholipid classes were separated by HPLC, and subjected to MS(/MS) to determine the species compositions of PC, PE, PI, and PS, as indicated in the respective panels. The major  $[M+H]^+$  species of PC, PE and PS, as well as the major  $[M-H]^-$  species of PI are indicated by their  $m/z$  values. The species labels indicate total acyl carbons:total acyl double bonds. In each panel, the intensity of the highest peak was set at 100 %. See Table S2 for the molecular species assignment per cluster.

**Table S1** Relative abundance of fatty acids (mol%,  $\pm$  SD, n = 4) in total lipid extracts of WT, *acb1*, *crd1* and *crd1acb1* strains grown in SL medium. Lipids were transesterified and the fatty acid methyl esters were quantified by gas chromatography.

| Strain          | Fatty acids   |               |               |                |                |               |                |
|-----------------|---------------|---------------|---------------|----------------|----------------|---------------|----------------|
|                 | C12:0         | C14:0         | C14:1         | C16:0          | C16:1          | C18:0         | C18:1          |
| WT              | 0.6 $\pm$ 0.2 | 1.2 $\pm$ 0.1 | 0.4 $\pm$ 0.0 | 17.1 $\pm$ 1.3 | 52.0 $\pm$ 1.4 | 5.0 $\pm$ 0.9 | 23.7 $\pm$ 1.6 |
| <i>acb1</i>     | 2.0 $\pm$ 0.2 | 2.3 $\pm$ 0.9 | 2.5 $\pm$ 0.6 | 14.0 $\pm$ 1.2 | 58.5 $\pm$ 0.2 | 3.3 $\pm$ 0.3 | 17.6 $\pm$ 0.8 |
| <i>crd1</i>     | 0.5 $\pm$ 0.2 | 1.1 $\pm$ 0.1 | 0.3 $\pm$ 0.0 | 17.0 $\pm$ 0.3 | 50.2 $\pm$ 2.6 | 5.3 $\pm$ 1.6 | 25.7 $\pm$ 1.2 |
| <i>crd1acb1</i> | 1.8 $\pm$ 0.4 | 2.5 $\pm$ 0.1 | 2.7 $\pm$ 0.1 | 12.7 $\pm$ 0.5 | 60.2 $\pm$ 1.4 | 2.6 $\pm$ 0.2 | 17.4 $\pm$ 0.7 |

**Table S2** Molecular species assignment for PC, PE, PI, PS and PG per cluster with the theoretical  $m/z$  values indicated

| Cluster | # double bonds | Possible acyl chain compositions <sup>a</sup>        | $m/z$ for indicated phospholipid class |     |     |     |                 |
|---------|----------------|------------------------------------------------------|----------------------------------------|-----|-----|-----|-----------------|
|         |                |                                                      | PC                                     | PE  | PI  | PS  | PG <sup>b</sup> |
| C26     | 0              | (16:0)(C10:0), (C14:0)(C12:0)                        | 650                                    | 608 | 725 | 652 | 637             |
|         | 1              | (16:1)(C10:0), (C14:1)(C12:0)                        | 648                                    | 606 | 723 | 650 | 635             |
| C28     | 0              | (C18:0)(C10:0), (C16:0)(C12:0), (C14:0) <sub>2</sub> | 678                                    | 636 | 753 | 680 | 665             |
|         | 1              | (C18:1)(C10:0), (C16:1)(C12:0), (C14:1)(C14:0)       | 676                                    | 634 | 751 | 678 | 663             |
| C30     | 2              | (C14:1) <sub>2</sub>                                 | 674                                    | 632 | 749 | 676 | 661             |
|         | 0              | (C18:0)(C12:0), (C16:0)(C14:0)                       | 706                                    | 664 | 781 | 708 | 693             |
|         | 1              | (C18:1)(C12:0), (C16:1)(C14:0), (C16:0)(C14:1)       | 704                                    | 662 | 779 | 706 | 691             |
| C32     | 2              | (C16:1)(C14:1)                                       | 702                                    | 660 | 777 | 704 | 689             |
|         | 0              | (C18:0)(C14:0), (C16:0) <sub>2</sub>                 | 734                                    | 692 | 809 | 736 | 721             |
|         | 1              | (C18:1)(C14:0), (C16:1)(C16:0), (C18:0)(C14:1)       | 732                                    | 690 | 807 | 734 | 719             |
| C34     | 2              | (C18:1)(C14:1), (C16:1) <sub>2</sub>                 | 730                                    | 688 | 805 | 732 | 717             |
|         | 0              | (C18:0)(C16:0)                                       | 762                                    | 720 | 837 | 764 | 749             |
|         | 1              | (C18:1)(C16:0), (C18:0)(C16:1)                       | 760                                    | 718 | 835 | 762 | 747             |
| C36     | 2              | (C18:1)(C16:1)                                       | 758                                    | 716 | 833 | 760 | 745             |
|         | 0              | (C18:0) <sub>2</sub>                                 | 790                                    | 748 | 865 | 792 | 777             |
|         | 1              | (C18:1)(C18:0)                                       | 788                                    | 746 | 863 | 790 | 775             |
|         | 2              | (C18:1) <sub>2</sub>                                 | 786                                    | 744 | 861 | 788 | 773             |

<sup>a</sup> Only combinations of C10-C18 acyl chains are listed. Note: not all combinations are present in equal amounts, since some acyl chains are more abundant than others (see also Table S1). <sup>b</sup> For peak assignments in Figure 8A, the listed  $m/z$  values should be increased by 5 to account for the presence of d5-glycerol in labeled PG.

**Table S3** MLCL and CL molecular species assignment per cluster with the theoretical  $m/z$  values indicated

| Lipid | Cluster | Possible acyl chain compositions <sup>a</sup>                                                                                                                                                                                                        | $m/z$ for indicated # of double bonds |     |     |     |     |
|-------|---------|------------------------------------------------------------------------------------------------------------------------------------------------------------------------------------------------------------------------------------------------------|---------------------------------------|-----|-----|-----|-----|
|       |         |                                                                                                                                                                                                                                                      | 0                                     | 1   | 2   | 3   | 4   |
| MLCL  | C38     | (C18)(C10) <sub>2</sub> , (C16)(C12)(C10), (C14) <sub>2</sub> (C10), (C14)(C12) <sub>2</sub>                                                                                                                                                         | 486                                   | 485 | 484 | -   | -   |
|       | C40     | (C18)(C12)(C10), (C16)(C14)(C10), (C16)(C12) <sub>2</sub> , (C14) <sub>2</sub> (C12)                                                                                                                                                                 | 500                                   | 499 | 498 | -   | -   |
|       | C42     | (C18)(C14)(C10), (C18)(C12) <sub>2</sub> , (C16) <sub>2</sub> (C10), (C16)(C14)(C12), (C14) <sub>3</sub>                                                                                                                                             | 514                                   | 513 | 512 | 511 | -   |
|       | C44     | (C18)(C16)(C10), (C18)(C14)(C12), (C16) <sub>2</sub> (C12), (C16)(C14) <sub>2</sub>                                                                                                                                                                  | 528                                   | 527 | 526 | 525 | -   |
|       | C46     | (C18) <sub>2</sub> (C10), (C18)(C16)(C12), (C18)(C14) <sub>2</sub> , (C16) <sub>2</sub> (C14)                                                                                                                                                        | 542                                   | 541 | 540 | 539 | -   |
|       | C48     | (C18) <sub>2</sub> (C12), (C18)(C16)(C14), (C16) <sub>3</sub>                                                                                                                                                                                        | 556                                   | 555 | 554 | 553 | -   |
|       | C50     | (C18) <sub>2</sub> (C14), (C18)(C16) <sub>2</sub>                                                                                                                                                                                                    | 570                                   | 569 | 568 | 567 | -   |
|       | C52     | (C18) <sub>2</sub> (C16)                                                                                                                                                                                                                             | 584                                   | 583 | 582 | 581 | -   |
|       | C54     | (C18) <sub>3</sub>                                                                                                                                                                                                                                   | 598                                   | 597 | 596 | 595 | -   |
| CL    | C52     | (C18)(C14)(C10) <sub>2</sub> , (C18)(C12) <sub>2</sub> (C10), (C16) <sub>2</sub> (C10) <sub>2</sub> , (C16)(C14)(C12)(C10), (C16)(C12) <sub>3</sub> , (C14) <sub>3</sub> (C10), (C14) <sub>2</sub> (C12) <sub>2</sub>                                | 591                                   | 590 | 589 | 588 | -   |
|       | C54     | (C18)(C16)(C10) <sub>2</sub> , (C18)(C14)(C12)(C10), (C18)(C12) <sub>3</sub> , (C16) <sub>2</sub> (C12)(C10), (C16)(C14) <sub>2</sub> (C10), (C16)(C14)(C12) <sub>2</sub> , (C14) <sub>3</sub> (C12)                                                 | 605                                   | 604 | 603 | 602 | -   |
|       | C56     | (C18) <sub>2</sub> (C10) <sub>2</sub> , (C18)(C16)(C12)(C10), (C18)(C14) <sub>2</sub> (C10), (C18)(C14)(C12) <sub>2</sub> , (C16) <sub>2</sub> (C14)(C10), (C16) <sub>2</sub> (C12) <sub>2</sub> , (C16)(C14) <sub>2</sub> (C12), (C14) <sub>4</sub> | 619                                   | 618 | 617 | 616 | 615 |
|       | C58     | (C18) <sub>2</sub> (C12)(C10), (C18)(C16)(C14)(C10), (C18)(C16)(C12) <sub>2</sub> , (C18)(C14) <sub>2</sub> (C12), (C16) <sub>3</sub> (C10), (C16) <sub>2</sub> (C14)(C12), (C16)(C14) <sub>3</sub>                                                  | 633                                   | 632 | 631 | 630 | 629 |
|       | C60     | (C18) <sub>2</sub> (C14)(C10), (C18) <sub>2</sub> (C12) <sub>2</sub> , (C18)(C16) <sub>2</sub> (C10), (C18)(C16)(C14)(C12), (C18)(C14) <sub>3</sub> , (C16) <sub>3</sub> (C12), (C16) <sub>2</sub> (C14) <sub>2</sub>                                | 647                                   | 646 | 645 | 644 | 643 |
|       | C62     | (C18) <sub>2</sub> (C16)(C10), (C18) <sub>2</sub> (C14)(C12), (C18)(C16) <sub>2</sub> (C12), (C18)(C16)(C14) <sub>2</sub> , (C16) <sub>3</sub> (C14)                                                                                                 | 661                                   | 660 | 659 | 658 | 657 |
|       | C64     | (C18) <sub>3</sub> (C10), (C18) <sub>2</sub> (C16)(C12), (C18) <sub>2</sub> (C14) <sub>2</sub> , (C18)(C16) <sub>2</sub> (C14), (C16) <sub>4</sub>                                                                                                   | 675                                   | 674 | 673 | 672 | 671 |
|       | C66     | (C18) <sub>3</sub> (C12), (C18) <sub>2</sub> (C16)(C14), (C18)(C16) <sub>3</sub>                                                                                                                                                                     | 689                                   | 688 | 687 | 686 | 685 |
|       | C68     | (C18) <sub>3</sub> (C14), (C18) <sub>2</sub> (C16) <sub>2</sub>                                                                                                                                                                                      | 703                                   | 702 | 701 | 700 | 699 |
|       | C70     | (C18) <sub>3</sub> (C16)                                                                                                                                                                                                                             | 717                                   | 716 | 715 | 714 | 713 |
|       | C72     | (C18) <sub>4</sub>                                                                                                                                                                                                                                   | 731                                   | 730 | 729 | 728 | 727 |

<sup>a</sup> Only compositions based on C10-C18 acyl chains are listed. Note: not all combinations are present in equal amounts, since some acyl chains are more abundant than others (see also Table S1).
